# Supplementary material
Source: publisher site journal article supplement (https://www.dovepress.com/article/420095)

VITEK® MS

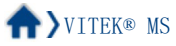

Strain information

Sample NO. : 20001-1

Sample Type:

Confidence level:

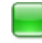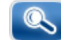

Number of identification results:1

List of identification results

| Location | Data           | Bacterial name  | Pathogenicity    | Confidence | Confidence level |
|----------|----------------|-----------------|------------------|------------|------------------|
| L3       | 23-2-20 AM9:54 | Vibrio cholerae | Deadly pathogens | 99.9       |                  |

Icon interpretation:

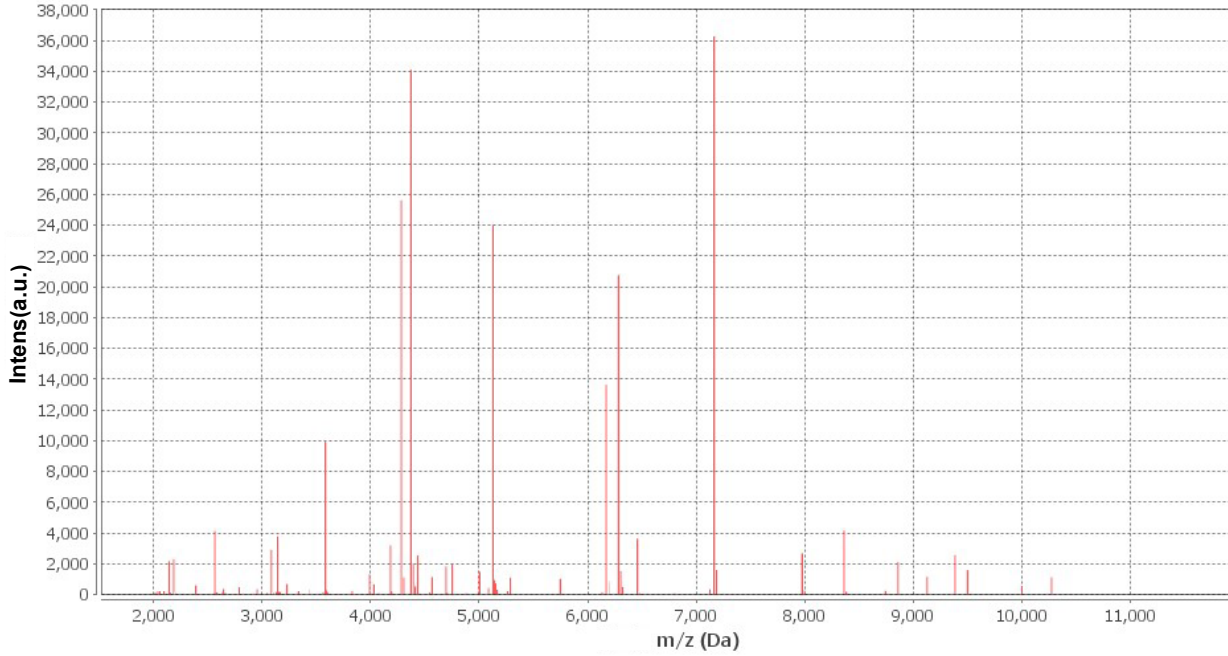

Supplement: Supplementary file 1 [file get_supplementary_file.php]
